# Supplementary material
Source: Springer Nature journal article supplement (https://www.springermedizin.de/resource/supplementary/12884_2014_1093_MOESM3_ESM.pdf/9458902)
Supplement: MOESM3 [file 9458902]

Type of delivery

■ Vaginal  
■ Cesarean

| Node 0     |       |        |
|------------|-------|--------|
| Category   | %     | n      |
| ■ Vaginal  | 69,7  | 148917 |
| ■ Cesarean | 30,3  | 64622  |
| Total      | 100,0 | 213539 |

Repeat CD  
Improvement=0,099

Yes

No

| Node 1     |      |       |
|------------|------|-------|
| Category   | %    | n     |
| ■ Vaginal  | 6,9  | 1637  |
| ■ Cesarean | 93,1 | 22059 |
| Total      | 11,1 | 23696 |

| Node 2     |      |        |
|------------|------|--------|
| Category   | %    | n      |
| ■ Vaginal  | 77,6 | 147280 |
| ■ Cesarean | 22,4 | 42563  |
| Total      | 88,9 | 189843 |

Mal-position/Mal-presentation  
Improvement=0,054

No

Yes

| Node 3     |      |        |
|------------|------|--------|
| Category   | %    | n      |
| ■ Vaginal  | 82,0 | 146195 |
| ■ Cesarean | 18,0 | 32059  |
| Total      | 83,5 | 178254 |

| Node 4     |      |       |
|------------|------|-------|
| Category   | %    | n     |
| ■ Vaginal  | 9,4  | 1085  |
| ■ Cesarean | 90,6 | 10504 |
| Total      | 5,4  | 11589 |

Fetal distress  
Improvement=0,025

No

Yes

| Node 5     |      |        |
|------------|------|--------|
| Category   | %    | n      |
| ■ Vaginal  | 84,2 | 145583 |
| ■ Cesarean | 15,8 | 27379  |
| Total      | 81,0 | 172962 |

| Node 6     |      |      |
|------------|------|------|
| Category   | %    | n    |
| ■ Vaginal  | 11,6 | 612  |
| ■ Cesarean | 88,4 | 4680 |
| Total      | 2,5  | 5292 |

Abruptio placentae/Placenta previa  
Improvement=0,012

No

Yes

| Node 7     |      |        |
|------------|------|--------|
| Category   | %    | n      |
| ■ Vaginal  | 85,1 | 145459 |
| ■ Cesarean | 14,9 | 25422  |
| Total      | 80,0 | 170881 |

| Node 8     |      |      |
|------------|------|------|
| Category   | %    | n    |
| ■ Vaginal  | 6,0  | 124  |
| ■ Cesarean | 94,0 | 1957 |
| Total      | 1,0  | 2081 |
